# Supplementary material
Source: MDPI journal article supplement (https://www.mdpi.com/2311-7524/8/4/336)
Supplement: s1 [file s1]

# Supplementary Materials: Impact of *Pseudomonas* sp. SVB-B33 on Stress- and Cell Wall-Related Genes in Roots and Leaves of Hemp under Salinity

Roberto Berni, Jean-Francois Hausman, Silas Villas-Boas \* and Gea Guerriero \*

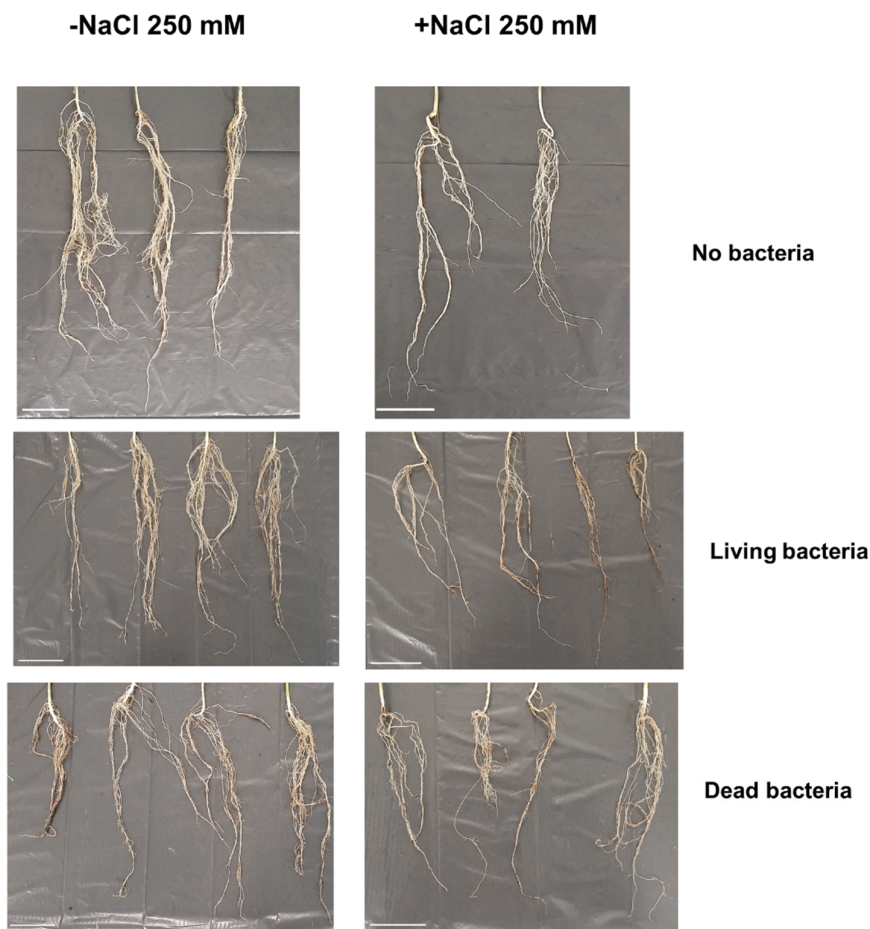

**Figure S1.** Images of roots from plants grown under control/salt stress conditions in the absence/presence of living or dead bacteria. The scale bar is 5 cm.

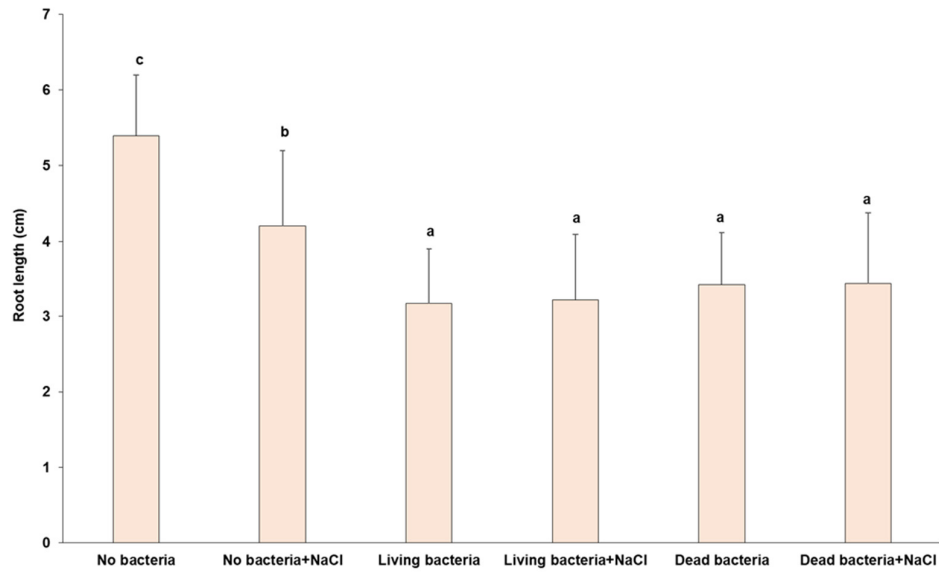

**Figure S2.** Length of roots from plants grown under control/salt stress conditions in the absence/presence of living or dead bacteria. Different letters indicate statistically significant values ( $p < 0.05$ ). Statistical parameters:  $X^2(5) = 73.534$ ,  $p = 0.000$ .

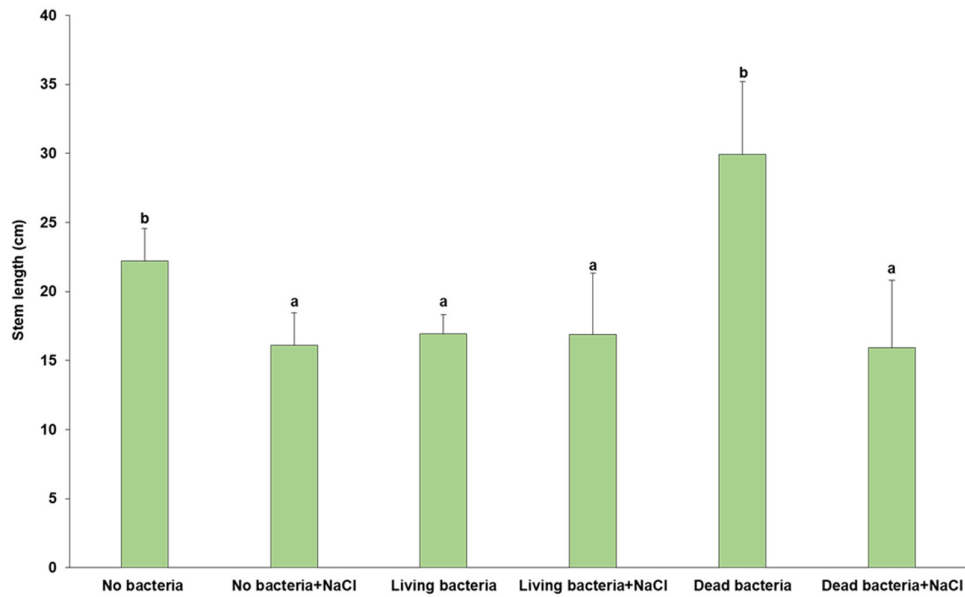

**Figure S3.** Length of stems from plants grown under control/salt stress conditions in the absence/presence of living or dead bacteria. Different letters indicate statistically significant values ( $p < 0.05$ ). Statistical parameters:  $X^2(5) = 43.845$ ,  $p = 0.000$ .

**Table S1.** Table showing the statistical parameters of Figure 5. Degree of freedom (df), F or  $X^2$  value and significance ( $p$ ). A parametric test (ANOVA one-way followed by the Tukey's post-hoc test) was applied for normal and homogeneous data, otherwise a non-parametric test (Kruskal-Wallis together with the Dunn's post-hoc test.) was performed.

| Roots               |      |        |       |
|---------------------|------|--------|-------|
| Parametric test     |      |        |       |
| Gene name           | df   | F      | $p$   |
| <i>CALB2</i>        | 5,12 | 14.969 | 0.000 |
| <i>CALB4-1</i>      | 5,12 | 13.519 | 0.000 |
| <i>CALB4-2</i>      | 5,12 | 12.849 | 0.000 |
| <i>CesA7</i>        | 5,12 | 2.670  | 0.076 |
| <i>CesA8</i>        | 5,12 | 1.947  | 0.160 |
| <i>ERF1</i>         | 5,12 | 4.929  | 0.013 |
| <i>HSP70-2</i>      | 5,12 | 0.761  | 0.595 |
| <i>HSP81-4</i>      | 5,12 | 0.920  | 0.501 |
| <i>CesA4</i>        | 5,12 | 0.988  | 0.464 |
| <i>LAC11</i>        | 5,12 | 0.094  | 0.992 |
| <i>LAC17</i>        | 5,12 | 1.002  | 0.457 |
| <i>FLA24</i>        | 5,12 | 3.379  | 0.039 |
| Non-parametric test |      |        |       |
| Gene name           | df   | $X^2$  | $p$   |
| <i>CALB4-3</i>      | 5    | 13.959 | 0.016 |
| <i>FLA18</i>        | 5    | 10.661 | 0.059 |
| <i>FLA20</i>        | 5    | 10.310 | 0.067 |
| <i>HSP70-1</i>      | 5    | 3.596  | 0.609 |
| Leaves              |      |        |       |
| Parametric test     |      |        |       |
| Gene name           | df   | F      | $p$   |
| <i>CALB2</i>        | 5,12 | 18.884 | 0.000 |
| <i>CALB4-1</i>      | 5,12 | 24.475 | 0.000 |
| <i>CALB4-2</i>      | 5,12 | 30.130 | 0.000 |
| <i>CALB4-3</i>      | 5,12 | 38.286 | 0.000 |
| <i>ERF1</i>         | 5,12 | 5.479  | 0.007 |
| <i>HSP70-2</i>      | 5,12 | 32.205 | 0.000 |
| <i>HSP81-4</i>      | 5,12 | 9.196  | 0.001 |
| <i>CesA4</i>        | 5,12 | 0.411  | 0.832 |
| <i>FLA18</i>        | 5,12 | 3.466  | 0.036 |
| <i>FLA20</i>        | 5,12 | 7.401  | 0.002 |
| <i>FLA24</i>        | 5,12 | 15.425 | 0.000 |
| Non-parametric test |      |        |       |

| Gene name      | df | $\chi^2$ | <i>p</i> |
|----------------|----|----------|----------|
| <i>CesA7</i>   | 5  | 10.848   | 0.054    |
| <i>CesA8</i>   | 5  | 11.152   | 0.048    |
| <i>HSP70-1</i> | 5  | 8.860    | 0.115    |
| <i>LAC11</i>   | 5  | 14.287   | 0.014    |
| <i>LAC17</i>   | 5  | 15.129   | 0.010    |
